# Supplementary material for: Constructing BiOBr/g-C3N4/Bi2O2CO3 Z-Scheme Photocatalyst With Enhanced Photocatalytic Activity
Source: Research Square preprint supplement (doi:10.21203/rs.3.rs-309897/v1), 2021-03-18
Supplement: Supplementary file 1 [file 2fcb49a31173c7ee36ddc1ac.docx]

**Supplementary Information**

**Construction of BiOBr/g-C3N4/Bi2O2CO3 Z-scheme photocatalyst with enhanced photocatalytic activity**

Biao Zhang a, Yu Liu a, *, Kanghong Zhou a, Hongyu Zhu a, Dongxu Gu a, Wei Ge a, Ying Gan a, Jianyuan Hao a, *

a School of Materials and Energy, University of Electronic Science and Technology of China, Chengdu, 610054 China

* Corresponding author: Yu Liu, Jianyuan Hao,

Yu Liu, School of Materials and Energy, University of Electronic Science and Technology of China, Chengdu, 610054, China, E-mail: poly1634@hotmail.com.

Jianyuan Hao, School of Materials and Energy, University of Electronic Science and Technology of China, Chengdu, 610054, China, E-mail: jyhao@uestc.edu.cn.

**1 Experimental**

**1.1 Preparation of BiOBr(BOB) and Bi2O2CO3(BOC) catalysts**

The BOB and BOC were prepared by hydrothermal method[[1]](#OLE_LINK11). Typically, 0.485 g of Bi(NO3)3·5H2O was dissolved in 40 ml deionized water and stirred for 30 min (suspension A). 0.119 g of KBr was added to 40 ml deionized water and sonicated for 30 min (suspension B). Both A and B were mixed thoroughly with continuous stirring for another 30 min. The reactor was put into an oven and kept at 160 °C for 24 h. After being cooled to room temperature, the precipitates were washed with distilled water for three times and dried at 80 °C for 12 h. The BOC was prepared in the same way, except that KBr is replaced by urea (0.3 g).

**1.2 Characterization**

The crystalline phases were characterized using an X-ray diffractometer (XRD) (X' Pert PRO, Netherlands) with Cu(Kα) radiation (λ = 1.5406 Å) in the 2θ range of 5 - 80°. Fourier transform infrared spectra (FTIR) of photocatalysts were analyzed by a thermo Fisher Nicolet Is10 spectrometer. The morphology and composition were determined by scanning electron microscopy (SEM) (Hitachi, s-4800, Japan) and energy dispersive spectroscopy (EDS), respectively. Chemical composition of catalysts was determined by X-ray photoelectron spectroscopy (XPS) (ThermoFischer, ESCALAB Xi+, America). The photoluminescence (PL) spectra were measured using a Hitachi F-7000 fluorescence spectrophotometer. UV-vis diffuse reflectance spectra (UV-vis DRS) were detected by UV spectrophotometer (Shimadzu, Japan).

**1.3 Evaluation of photocatalytic activity**

30 mg of catalyst was added into 100 mL of rhodamine B (Rh B) solution (20 mg/L). The suspension was kept in the dark for 30 min to establish the adsorption-desorption equilibrium followed by exposure to visible light (LED, 50 W, 400 nm< λ < 800 nm (Fig. S2)) with constant stirring. At given time intervals, 4 ml of suspension was collected and centrifuged (8000 rpm, 5 min) to remove the photocatalyst particles thoroughly. The concentrations of Rh B were analyzed by UV-2450 (SHIMADZU, Japan) at 554 nm. ·O2-, ·OH and h+ were scavenged by benzoquinone (BQ, 0.001M), isopropyl alcohol (IPA, 0.005M), triethanolamine (EDTA-2Na, 0.005M), respectively.


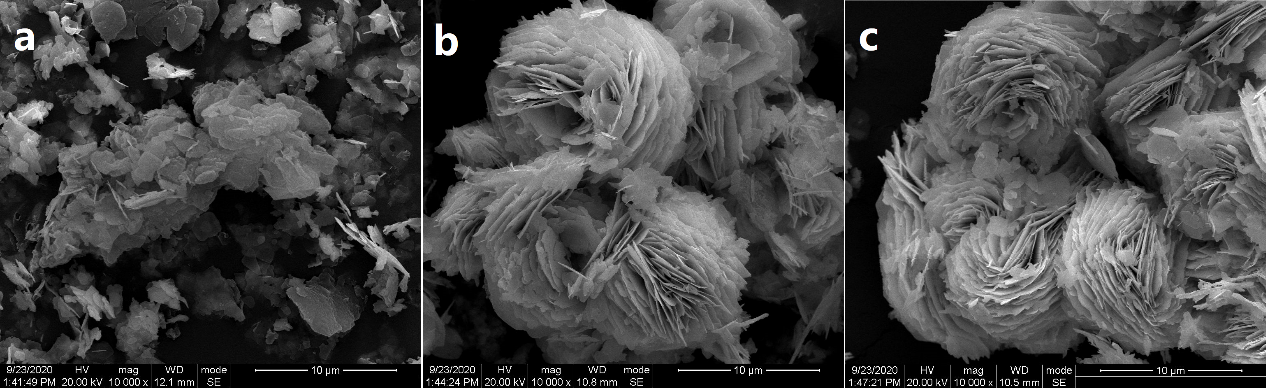


**Fig. S1** SEM images of (a) 0.1CN (b) 0.05CN, and (c) 0.025CN.


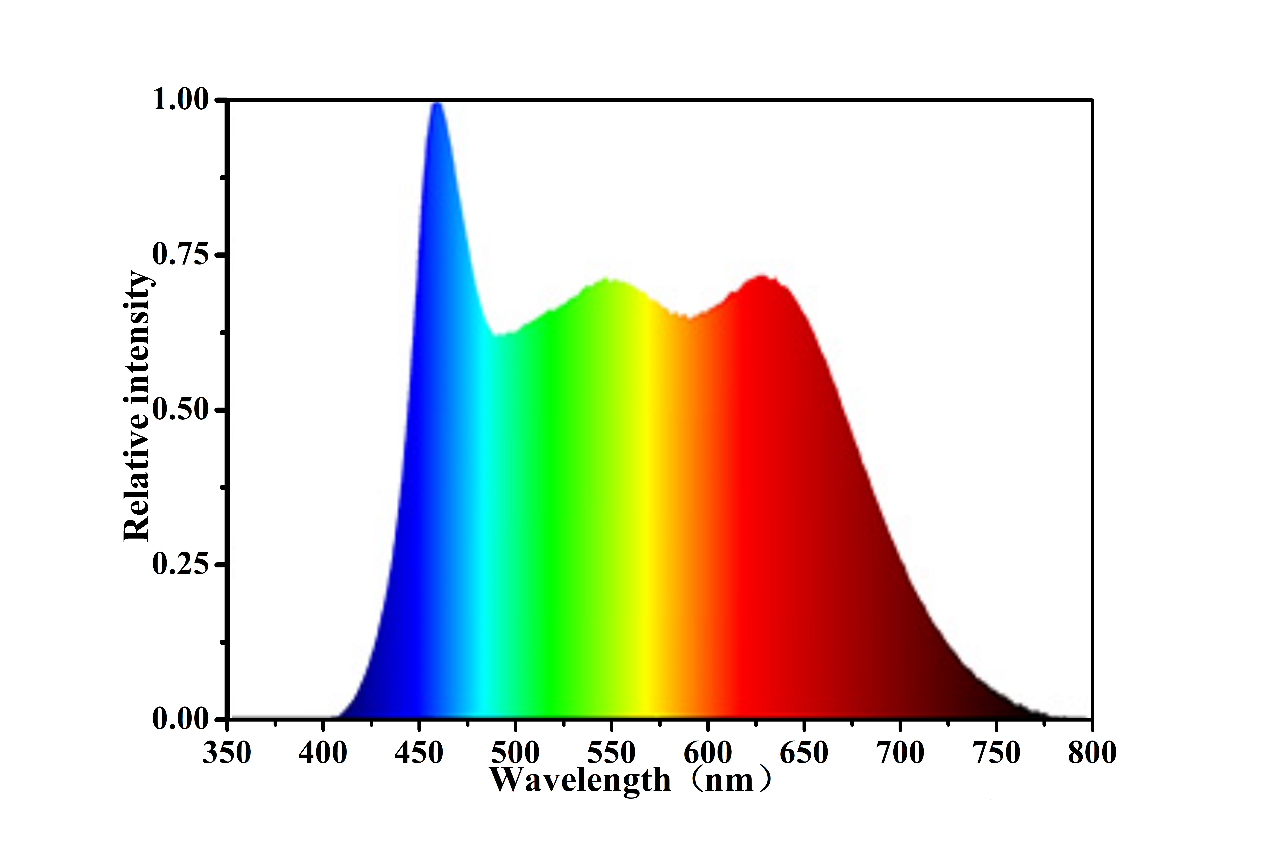


**Fig. S2** Emission spectrum of Vis LED light.

**Table S1**

**Comparisons of Rh B degradation among different photocatalysts**

| Photocatalysts | Catalysts quality | Initial concentration | Removal efficiency | Light | Time | Refs |
| --- | --- | --- | --- | --- | --- | --- |
| PANI/Ag3PO4/NiFe2O4 | 25mg | 10 mg/L (50 mL) | nearly 100% | 65W visible lamp | 40 min | [[2]](#OLE_LINK12) |
| BiVO4/g-C3N4/AgI | 20mg | 10 mg/L (50 mL) | 94.67% | 500W  Xe lamp | 60 min | [[3]](#OLE_LINK13) |
| FeWO4/WO3/Fe2O3 | 10mg | 6 mg/L (50 mL) | 90% | 300W  Xe lamp | 80 min | [[4]](#OLE_LINK14) |
| g-C3N4/ ZnS/CuS | 50mg | 10 mg/L (100 mL) | 90% | 500W  Xe lamp | 90 min | [[5]](#OLE_LINK15) |
| TiO2/CeO2/Bi2O3 | 50mg | 8 mg/L (100 mL) | 55% | 500W  Xe lamp | 120 min | [[6]](#OLE_LINK16) |
| BiOBr/g-C3N4/Bi2O2CO3 | 30mg | 20 mg/L (100 mL) | 98% | 50W  LED | 60 min | This work |

**References**

1. D. Majhi, K. Das, A. Mishra, R. Dhiman, B.G. Mishra, Appl. Catal. B. **260**, 118222 (2020).
2. Y. Chen, P. Zhu, M. Duan, J. Li, Z. Ren, P. Wang, Appl. Surf. Sci. **486** 198 (2019).
3. M. Xu, J. Yang, C. Sun, Y. Cui, L. Liu, H. Zhao, B. Liang, J. Mater. Sci. **56**, 1328 (2020).
4. H. Wang, C. Wang, X. Cui, L. Qin, R. Ding, L. Wang, Z. Liu, Z. Zheng, B. Lv, Appl. Catal. B. **221**, 169 (2018).
5. Y. Sun, J. Jiang, Y. Cao, Y. Liu, S. Wu, J. Zou, Mater. Lett. **212**, 288 (2018).
6. Z. Zou, C. Xie, S. Zhang, X. Yu, T. Zou, J. Li, J. Alloys Compd. **581**, 385 (2013).
